# Supplementary material for: QM/MM and molecular dynamics investigation of the mechanism of covalent inhibition of TAK1 kinase
Source: Royal Society of Chemistry journal article supplement (doi:10.1039/d0ob02273j), 2021-01-01
Supplement: d0ob02273j2.pdf [file d0ob02273j2.pdf]

## Supporting Information

### QM/MM and Molecular Dynamics Investigation of the Mechanism of Covalent Inhibition of TAK1 Kinase

*Borvornwat Toviwek, Duangkamol Gleeson and M. Paul Gleeson*

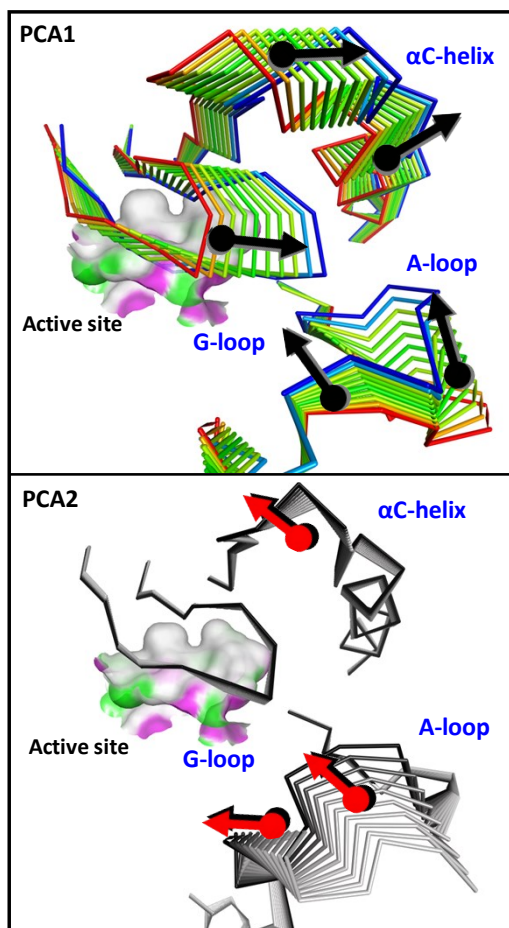

**Figure S1** Illustration of the protein movements associated with PC1 and PC2 (80 ns).

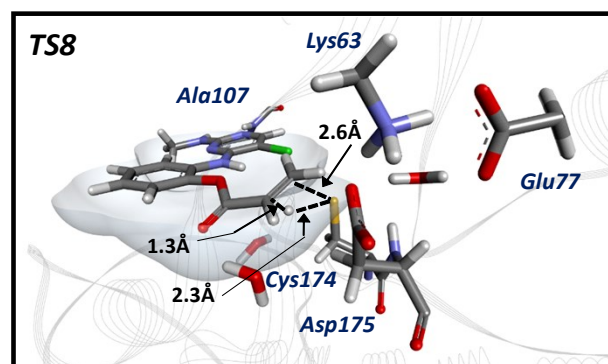

**Figure S2** Illustration of the 3D structure obtained for TS8 of cluster 1. This corresponds to a direct addition process and is found to be energetically highly undesirable.

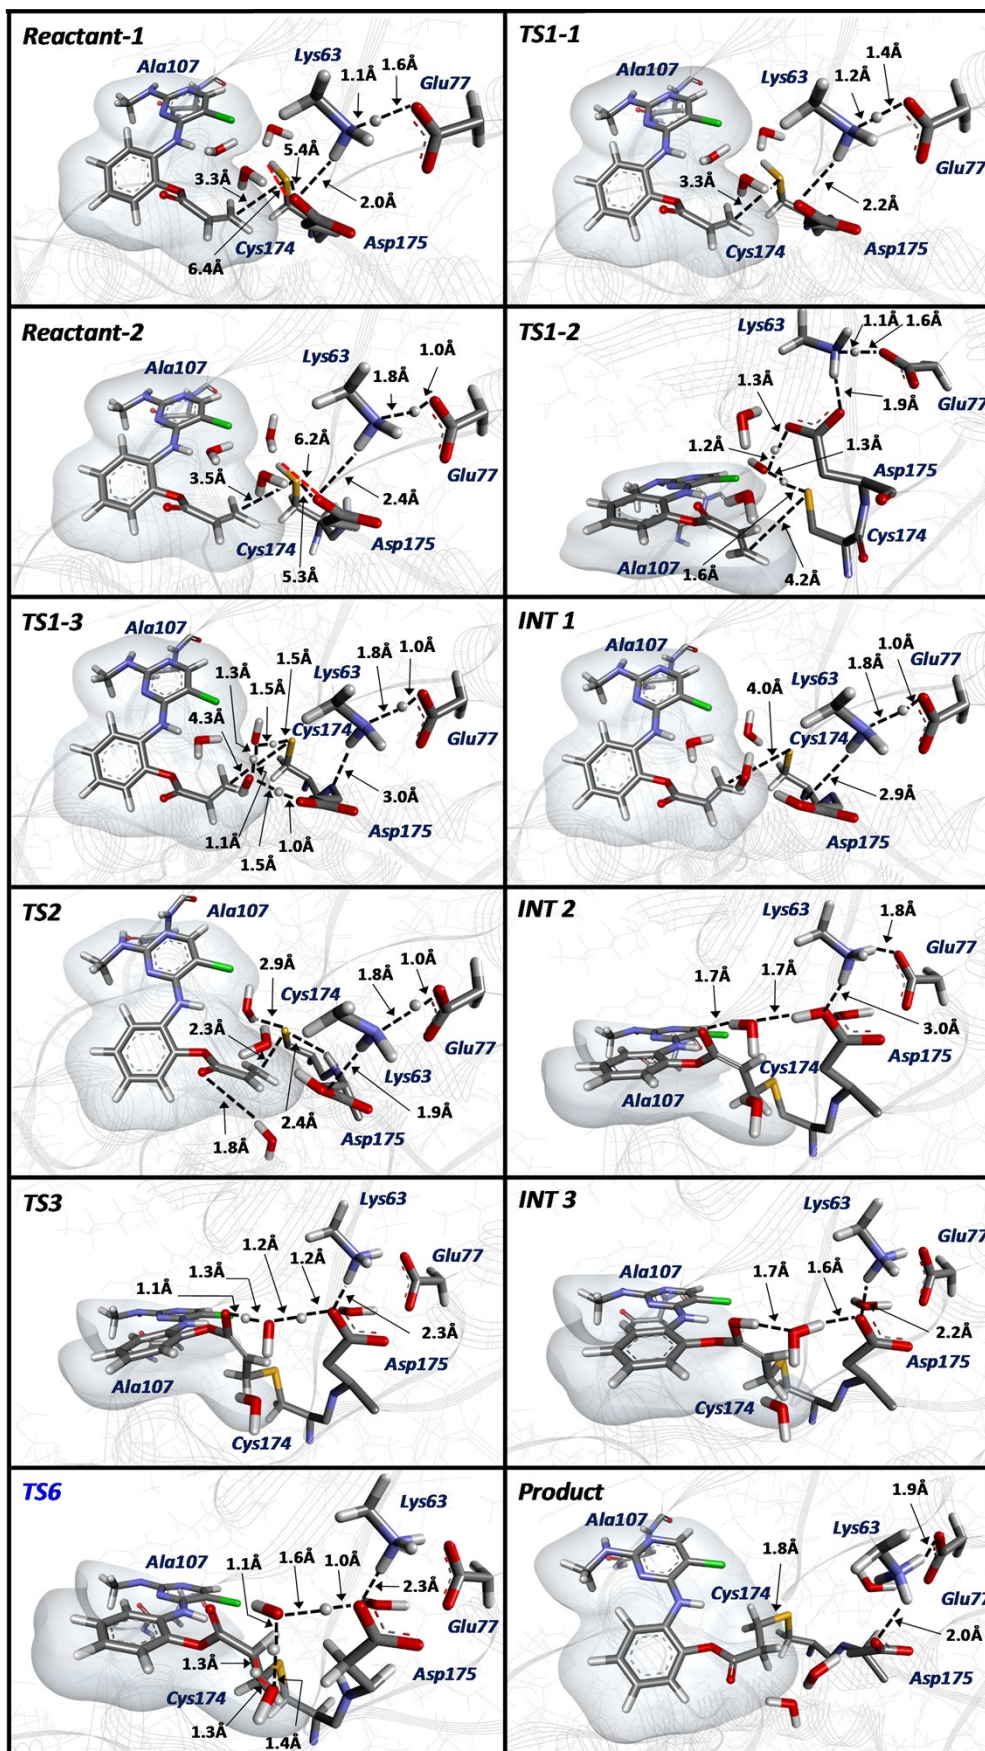

Figure S3 Illustration of the 3D structure obtained for cluster 2.

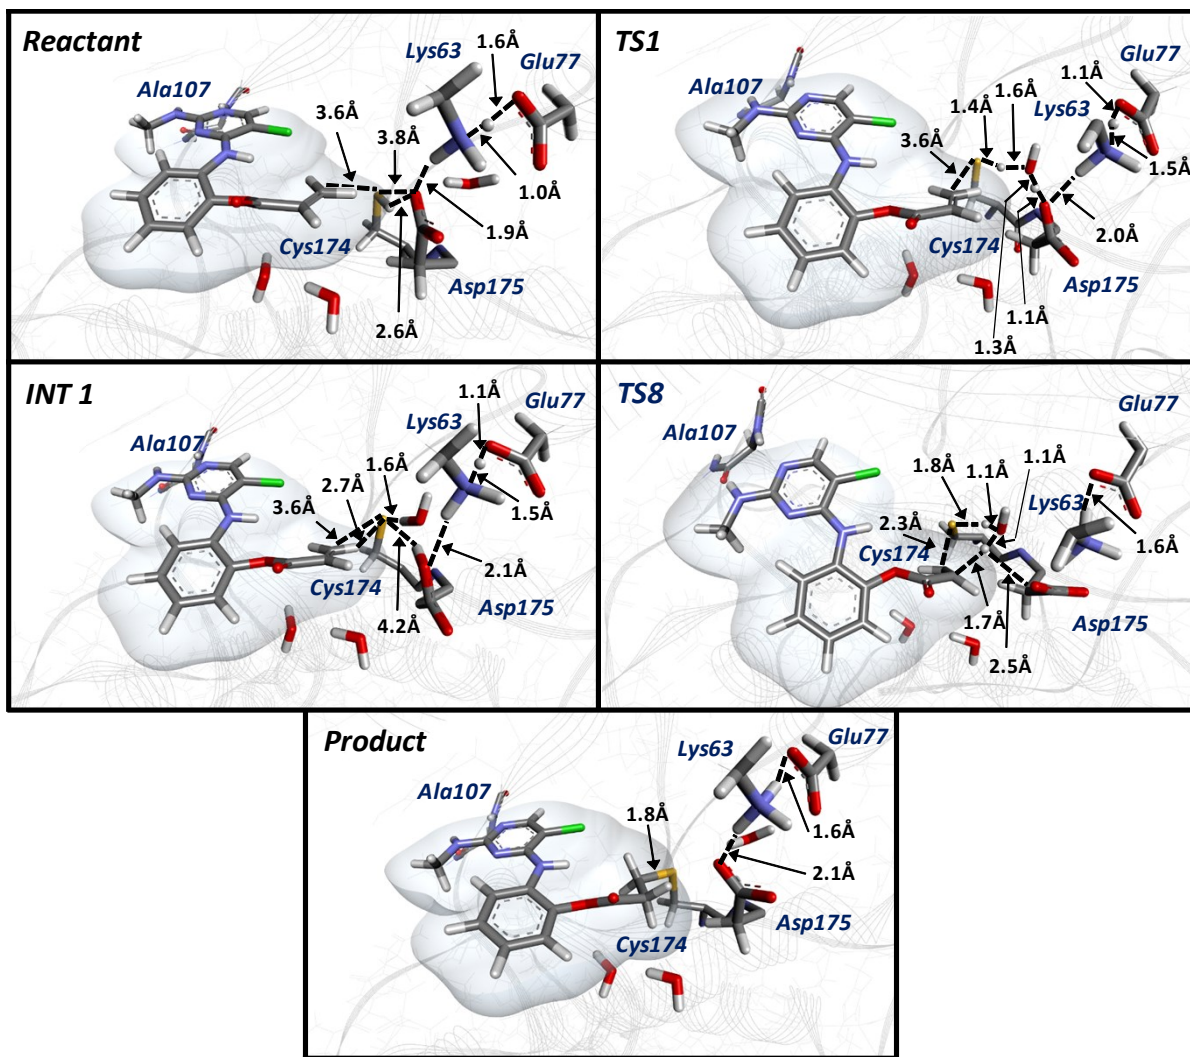

Figure S4 Illustration of the 3D structure obtained for cluster 3.

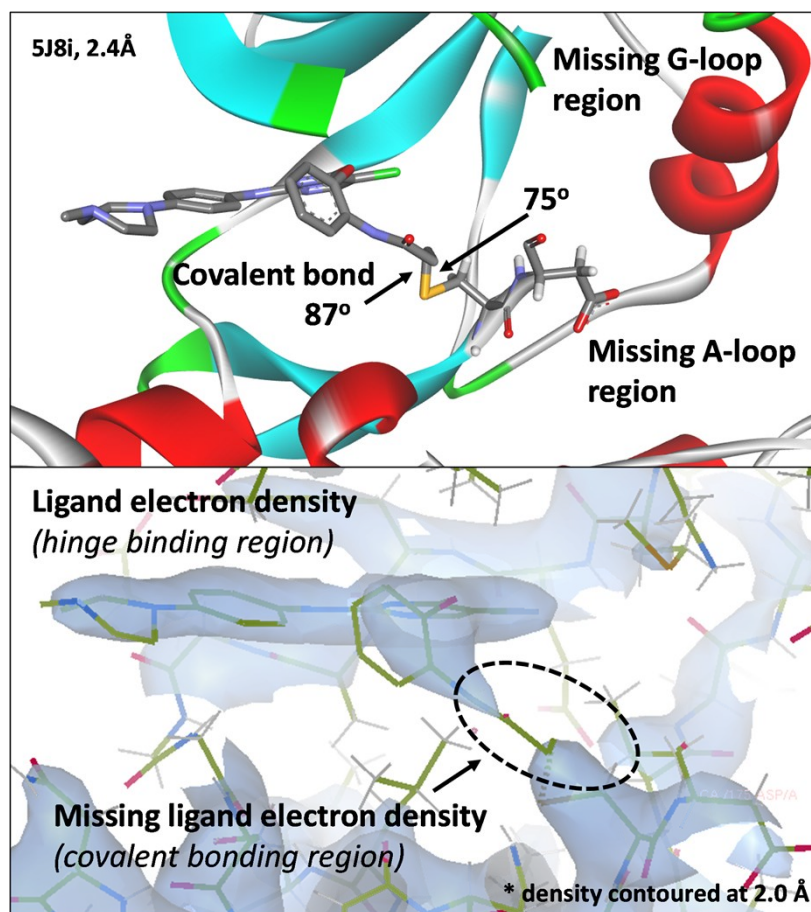

**Figure S5** Electron density in TAK1 structure 5J8I. The covalent complex formed with diamino pyrimidine inhibitor indicates high protein flexibility consistent with the MD simulations: (a) missing G-loop atoms, (b) missing A-loop atoms and (c) limited electron density associated with covalent bond resulting in a distorted bonds C-S bond.

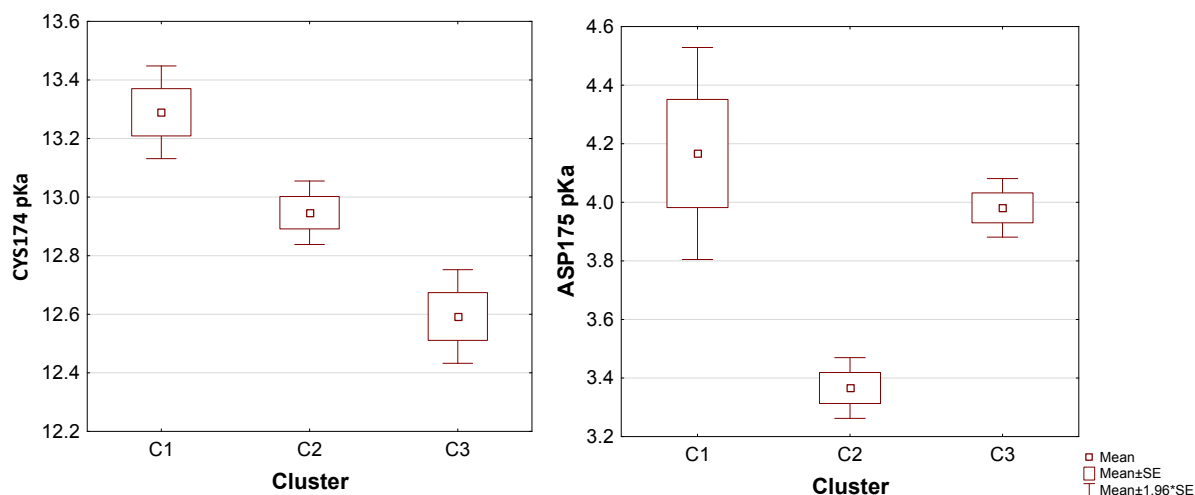

**Figure S6** Distribution of predicted pKas (Propka 3) for residues Cys174 and Asp175 over the course of the 80ns simulation.

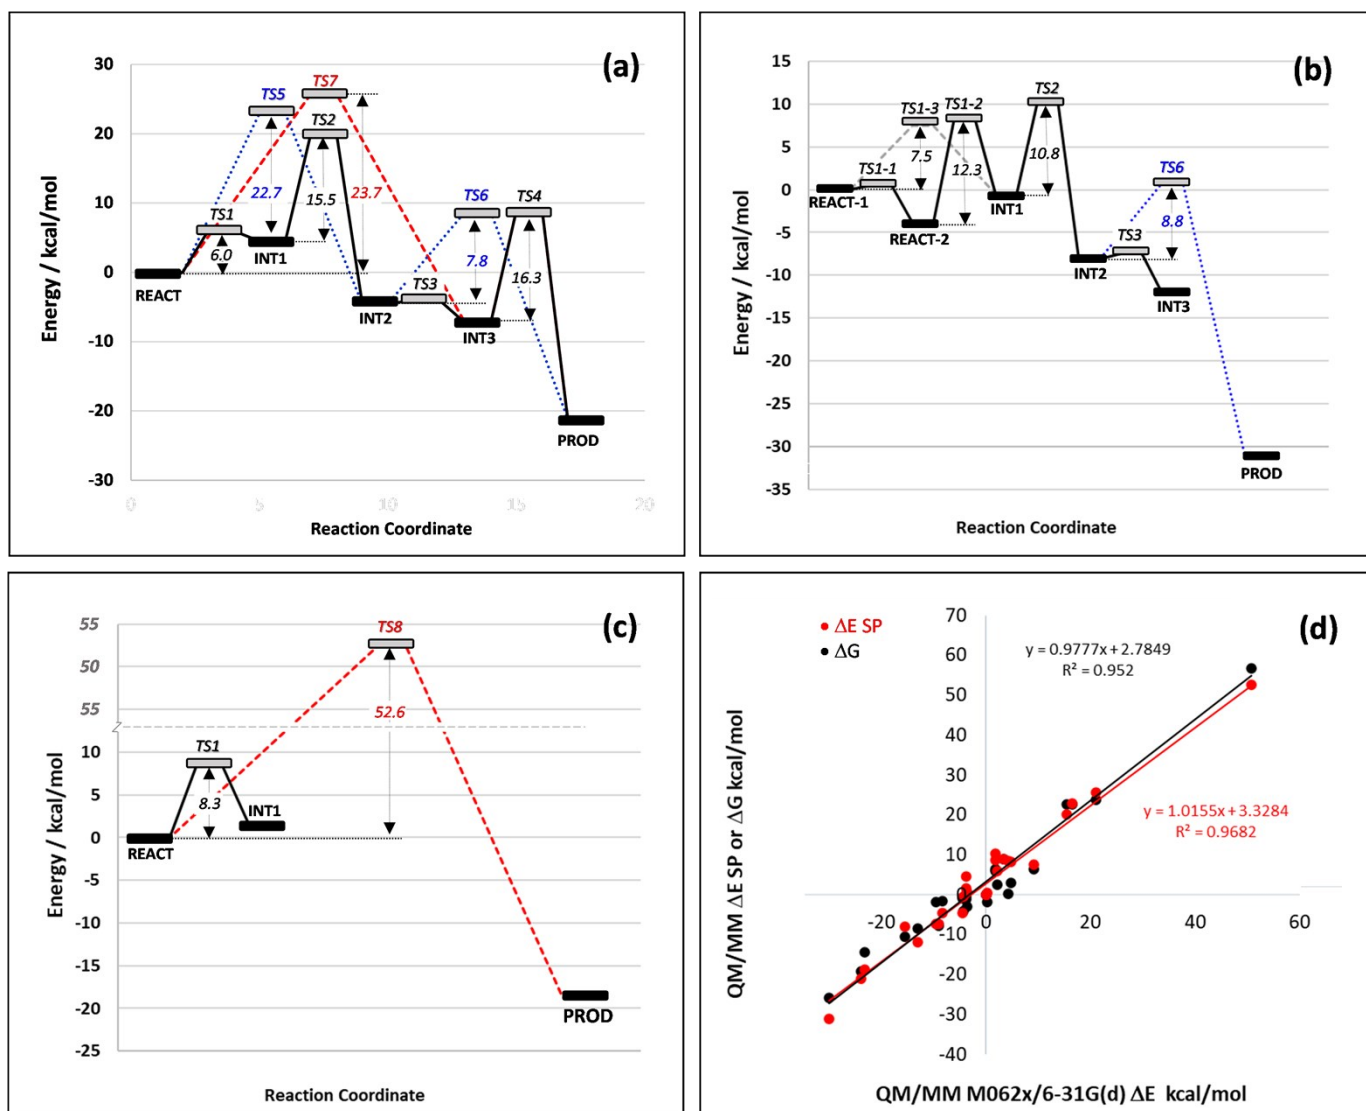

**Figure S7** Energy profiles ( $\Delta E_{sp}$ ) (M06-2X/6-31G\*//AMBER) associated for covalent adduct formation for structures representative of (a) cluster 1, (b) cluster 2 and (c) cluster 3 and (d) relationship between M062X/6-31G\*  $\Delta E$ , M06-2X/6-311++G(d,p)// M06-2X/6-31G\*  $\Delta E_{sp}$  and M06-2X/6-31G\*  $\Delta G$

**Table S1** Relative energies of stationary points for Clusters 1, 2 and 3 in kcal/mol.

| ID    | $\Delta E$ | $\Delta E_{SP}$ | $\Delta G$ | Cluster |
|-------|------------|-----------------|------------|---------|
| REACT | 0.00       | 0.00            | 0.00       | One     |
| TS1   | 2.23       | 5.96            | 2.46       | One     |
| INT1  | -3.79      | 4.49            | -0.56      | One     |
| TS2   | 15.45      | 20.04           | 22.53      | One     |
| TS5   | 16.43      | 22.93           | 22.72      | One     |
| TS7   | 21.02      | 25.72           | 23.71      | One     |
| INT2  | -8.28      | -4.56           | -1.52      | One     |
| TS3   | -4.58      | -4.50           | -0.92      | One     |
| TS6   | 1.76       | 8.74            | 6.33       | One     |
| INT3  | -9.60      | -7.30           | -1.94      | One     |
| TS4   | 3.43       | 9.00            | 8.82       | One     |
| PROD  | -23.85     | -21.08          | -19.17     | One     |
| TS8   | 58.47      | 65.52           | 59.06      | One     |

  

| ID     | $\Delta E / \text{A.U.}$ | $\Delta E / SP$ | $E / \Delta G$ | Cluster |
|--------|--------------------------|-----------------|----------------|---------|
| REACT1 | 0.00                     | 0.00            | 0.00           | Two     |
| REACT2 | -6.67                    | -3.87           | -5.29          | Two     |
| TS1-1  | 0.28                     | 0.55            | -1.81          | Two     |
| TS1-3  | 4.32                     | 8.44            | 0.23           | Two     |
| TS1-2  | 9.14                     | 7.50            | 6.40           | Two     |
| INT1   | -4.24                    | -0.50           | -4.20          | Two     |
| TS2    | 1.85                     | 10.31           | 5.84           | Two     |
| INT2   | -15.58                   | -8.12           | -10.52         | Two     |
| TS3    | -9.09                    | -7.41           | -7.85          | Two     |
| TS6    | -3.67                    | 0.72            | -3.04          | Two     |
| INT3   | -13.00                   | -12.00          | -8.47          | Two     |
| PROD   | -30.00                   | -31.18          | -25.86         | Two     |

  

| ID    | $\Delta E / \text{A.U.}$ | $\Delta E / SP$ | $E / \Delta G$ | Cluster |
|-------|--------------------------|-----------------|----------------|---------|
| REACT | 0.00                     | 0.00            | 0.00           | Three   |
| TS1   | 4.86                     | 8.34            | 2.85           | Three   |
| INT1  | -3.85                    | 1.69            | -1.20          | Three   |
| PROD  | -23.16                   | -18.72          | -14.36         | Three   |
| TS8   | 50.77                    | 52.61           | 56.81          | Three   |
